# Interaction of taste and place coding in the hippocampus

**Running title:** Taste and place coding in the hippocampus

**Authors:** Linnea E. Herzog<sup>1</sup>, Leila May Pascual<sup>2</sup>, Seneca J. Scott<sup>2</sup>, Elon R. Mathieson<sup>2</sup>, Donald B. Katz<sup>1,2\*</sup> and Shantanu P. Jadhav<sup>1,2\*</sup>

<sup>1</sup>Graduate Program in Neuroscience, Brandeis University, Waltham, MA, 02453, USA

<sup>2</sup>Neuroscience Program, Department of Psychology, and Volen National Center for Complex Systems, Brandeis University, Waltham, MA, 02453, USA

\* These authors contributed equally to this work.

**Correspondence:** Donald B. Katz (dbkatz@brandeis.edu), Brandeis University, 415 South St., MS 062, Waltham, MA 02453

Shantanu P. Jadhav (shantanu@brandeis.edu), Brandeis University, 415 South St., MS 062, Waltham, MA 02453

**Number of Pages:** 38

**Number of Figures:** 6                      **Number of Tables:** 1

**Number of words:** Abstract (249 words); Introduction (643 words); Discussion (1477 words)

**Conflict of Interest:** The authors declare no competing financial interests.

**Acknowledgements:** This work was supported by a Sloan Research Fellowship in Neuroscience (Alfred P. Sloan Foundation) and Whitehall Foundation award to SPJ; NIH Grants R01 DC006666 and R01 DC007703 to DBK; Training grant T90 DA032435 to LEH.

## Abstract

An animal's survival depends on finding food, and the memory of food and contexts are often linked. Given that the hippocampus is required for spatial and contextual memory, it is reasonable to expect related coding of space and food stimuli in hippocampal neurons. However, relatively little is known about how the hippocampus responds to tastes, the most central sensory property of food. In this study, we examined the taste-evoked responses and spatial firing properties of single units in the dorsal CA1 hippocampal region as male rats received a battery of taste stimuli differing in both chemical composition and palatability within a specific spatial context. We identified a subset of hippocampal neurons that responded to tastes, some of which were place cells. These taste and place responses had a distinct interaction: taste-responsive cells tended to have less spatially specific firing fields, and place cells only responded to tastes delivered inside their place field. Like neurons in the amygdala and lateral hypothalamus, hippocampal neurons discriminated between tastes purely on the basis of palatability, and never coded taste quality in a "value-free" manner; these responses did not reflect movement or arousal. However, hippocampal taste responses emerged several hundred msec later than responses in other parts of the taste system, suggesting that the hippocampus does not influence real-time taste decisions, instead associating the hedonic value of tastes with a particular context. This incorporation of taste responses into existing hippocampal maps could be one way that animals use past experience to locate food sources.

## Significance statement

Finding food is essential for animals' survival, and taste and context memory are often linked. While hippocampal responses to space and contexts have been well characterized, little is known about how the hippocampus responds to tastes. Here, we identified a subset of hippocampal neurons that discriminated between tastes based on palatability. Cells with

## Page 2 of 38

stronger taste responses typically had weaker spatial responses, and taste responses were confined to place cells' firing fields. Hippocampal taste responses emerged later than in other parts of the taste system, suggesting that the hippocampus does not influence taste decisions, but rather, associates the hedonic value of tastes consumed within a particular context. This could be one way that animals use past experience to locate food sources.

## Introduction

The hippocampus is essential for spatial learning and memory, and is thought to provide a cognitive map of animals' experience. The central data for this view come from studies of place cells that respond to specific locations as animals explore their environments (O'Keefe and Nadel, 1978; Moser et al., 2008).

Given that one of the most obvious uses for such a mental map is to aid in the finding of food, it is surprising how little is known about how the hippocampus processes taste, the most central sensory property of food. It is reasonable to expect that taste information reaches the hippocampus; although not traditionally considered to be part of the taste system, anatomical studies show that the hippocampus receives projections, either directly or indirectly through the entorhinal cortex, from several brain regions in which taste information is processed, including the gustatory cortex (GC), orbitofrontal cortex, and amygdala (Suzuki and Amaral, 1994; von Bohlen und Halbach and Albrecht, 2002). Functional imaging studies in humans also indicate that the hippocampal formation is active during taste ingestion and discrimination (Zald et al., 1998; Haase et al., 2009; Spetter et al., 2010), and rodent lesion studies suggest that the hippocampus plays a role in taste learning (Reilly et al., 1993; Stone et al., 2005; Chinnakkaruppan et al., 2014).

A great deal is known about taste responses in other parts of the taste system: in cortex, these responses evolve dynamically, reflecting taste presence, identity and palatability in distinct epochs preceding the decision to consume or expel a given taste (Katz et al., 2001; Sadacca et al., 2012; Sadacca et al., 2016). However, it remains unclear if or how hippocampal taste responses co-exist and interact with representations of space. While hippocampal neurons are known to respond to tastes in a context-dependent manner (Ho et al., 2011), no studies to date have directly measured single unit responses to tastes in the hippocampus alongside spatial firing properties, or examined the dynamics of these responses.

Hippocampal place cells are certainly capable of encoding non-spatial information such as odors (Wood et al., 1999), visual cues (Fried et al., 1997), textures (Shapiro et al., 1997), tones (Moita et al., 2003) and time (Kraus et al., 2013). Place cells typically respond to these stimuli by modulating their firing rate ("rate remapping," Leutgeb et al., 2004; Allen et al., 2012) or firing location ("global remapping," Leutgeb et al., 2005; Fyhn et al., 2007). A new cognitive map can also be formed based on the parameters of a behaviorally relevant non-spatial stimulus (Kraus et al., 2013; Aronov et al., 2017). The difficulty inherent in dissociating spatial from non-spatial influences in behaving rodents (O'Keefe, 1999), however, has led some researchers to propose that seeming responses to non-spatial stimuli may simply reflect changes in animals' movement or attentive state, rather than sensory stimuli (Shan et al., 2016). To establish that non-spatial responses are genuine, it is necessary to show that spatially tuned neurons can discriminate between sensory stimuli.

Here, we did just this, recording single-unit activity in the dorsal CA1 region of awake rats while exposing them to four taste solutions. We identified subsets of place cells and interneurons that discriminated between tastes based purely on palatability; this pattern was consistent with those observed in basolateral amygdala (BLA; Fontanini et al., 2009) and lateral

## Page 4 of 38

hypothalamus (LH; Li et al., 2013), although hippocampal taste dynamics evolved much more slowly. Neurons classified as taste-responsive place cells responded exclusively to tastes delivered within their place field, and tended to have lower spatial selectivity than non-taste-responsive place cells. Together, these results establish that hippocampal responses to sensory stimuli do not simply reflect changes in arousal state, and can encode sensory parameters relevant for behavior. Further, they suggest that hippocampal taste responses may be used to form value-related associations between tastes and contexts, which can facilitate using past experience to locate food sources.

## Materials and Methods

### Animals and surgery

Five adult (450-550 g) male Long-Evans rats (Charles River Laboratories) were used as subjects in this study. Rats were kept on a 12 h light/dark cycle, with all sessions taking place around the same time during the light period. All surgical and experimental procedures were conducted in accordance with the National Institutes of Health guidelines and approved by the Brandeis University Institutional Animal Care and Use Committee.

After several weeks of habituation to daily handling, animals were chronically implanted with a microdrive array consisting of 25-30 independently moveable tetrodes in the right dorsal hippocampal region CA1 (-3.6 mm AP, 2.2 mm ML), and an intra oral cannula (IOC). Each IOC consisted of a polyethylene tube inserted beneath the temporalis muscle and terminating anterolateral to the first maxillary molar, allowing for the precise delivery of taste solutions onto the rat's tongue (Grill and Norgren, 1978; Travers and Norgren, 1986; Katz et al., 2001).

Following recovery from the implantation surgery (~7-8 days), rats were water-deprived to 85-90% of their *ad libitum* weight to ensure taste consumption during the recording sessions.

At ~14 d after implantation, animals were habituated for at least 3 days to the behavioral chamber, sleep box, and the delivery of taste solutions through the IOC. Following habituation, we performed daily recording sessions in which rats were exposed to pseudo-randomized sequences of four standard taste stimuli (see **Figure 1A, 1B** and *Passive taste administration paradigm*). Following the conclusion of experiments, we made electrolytic lesions through each electrode tip to mark recording locations. Brains were sectioned into 50  $\mu$ m slices and stained with cresyl violet to confirm electrode placement in the hippocampal cell layer (see **Figure 1C**).

# Passive taste administration paradigm

Each recording session typically lasted between 2 and 3 hours, and consisted of three sessions in a ~30 x 35 x 40 cm Plexiglass behavioral chamber (J. Green, Charles River Maker Lab) interleaved with four 15-20 minute sleep sessions in a ~30 x 30 x 40 cm black box (rest box). The first and last sessions in the behavioral chamber consisted of 15-20 minute periods in which animals were habituated to the behavioral chamber in the absence of tastes. During the middle experimental session (depicted in **Figure 1A**), rats received a pseudo-randomized sequence of four standard taste stimuli [sweet: 4 mM saccharin (S); salty: 100 mM sodium chloride (N); neutral: distilled water (W); and bitter: 5 mM quinine hydrochloride (Q)] that varied in hedonic value and fell within the range of concentrations typically used by other groups (3-20 mM saccharin, 10-300 mM sodium chloride, and 1-10 mM quinine; for review, see Frank and Brown, 2003; Kobayakawa et al., 2005; Accolla and Carleton, 2008; Geran and Travers, 2009; Chen et al., 2011; Sadacca et al., 2016). Taste solutions were delivered directly onto the tongue in ~40  $\mu$ L aliquots via four polyamide tubes inserted into the IOC, with a separate tube for each solution to prevent the mixing of tastes. Rats received 50 pseudo-randomized repeats of each of the four taste stimuli, for a total of 200 taste deliveries. The interval between taste deliveries was randomized to 13-17 seconds, allowing sufficient time for the taste system to reset between

presentations (A. Fontanini and D.B. Katz, unpublished observations). The total amount of fluid delivered in each ~50 minute taste administration period was 8 mL, after which animals had access to an additional 15-20 mL of water in their home cage.

### Electrophysiology

Electrophysiological recordings were conducted using a SpikeGadgets system (Tang et al., 2017). Spikes were sampled at 30 kHz and bandpass filtered between 600 Hz and 6 kHz. Local field potentials (LFPs) were sampled at 1.5 kHz and bandpass filtered between 0.5 and 400 Hz. During recording sessions, the animal's position and speed were recorded using an overhead monochrome CCD camera (30 fps) and tracked by LEDs affixed to the headstage.

Over ~14 d following surgery, tetrodes were gradually advanced to the CA1 hippocampal cell layer, as identified by characteristic EEG patterns (sharp-wave ripples, or SWRs; theta rhythm) as previously described (Jadhav et al., 2012; Jadhav et al., 2016; Tang et al., 2017). Tetrodes were readjusted after each day's recordings. Each animal had one hippocampal reference tetrode in corpus callosum, which was also referenced to a ground screw installed in the skull overlying cerebellum.

Single units were isolated offline based on peak amplitude and principal components (Matclust, M.P. Karlsson). Only well-isolated units with stable waveforms that fired at least 100 spikes per session were included in our analysis. Putative interneurons (*Int*) were identified on the basis of firing rate ( $> 8.5$  Hz) and spike width ( $< 0.35$  ms) parameters (**Figure 1D**), as characterized previously (Jadhav et al., 2016; Tang et al., 2017). All other isolated units were classified as pyramidal cells (*Pyr*). We isolated a total of 482 neurons from five rats, conducted across nine experiments. **Table 1** shows the distribution of cells across all five animals.

**Table 1.**

Cell distribution across animals

| Animal | CA1 cells |     |     |                  |     |     |
|--------|-----------|-----|-----|------------------|-----|-----|
|        | All       | Pyr | Int | Taste responsive | Pyr | Int |
| EM5    | 162       | 155 | 7   | 24               | 18  | 6   |
| LH36   | 41        | 39  | 2   | 7                | 5   | 2   |
| EM6    | 136       | 118 | 18  | 52               | 35  | 17  |
| LP1    | 91        | 79  | 12  | 11               | 6   | 5   |
| LH42   | 52        | 50  | 2   | 2                | 1   | 1   |
| Total  | 482       | 441 | 41  | 96               | 65  | 31  |

### SWR detection

SWRs were detected as previously described (Jadhav et al., 2016; Tang et al., 2017) using the ripple-band (150-250 Hz) filtering of LFPs from multiple tetrodes. A Hilbert transform was used to determine the envelope of band-passed LFPs, and events that exceeded a threshold (mean + 3 SD) were detected. SWR events were defined as the times around initially detected events when the envelope exceeded the mean. SWR periods were excluded from place field analysis, similar to previous studies (Jadhav et al., 2016; Tang et al., 2017).

### Palatability/preference data

Taste palatability was assessed using a brief-access task (BAT, Davis Rig Gustometer, Med Associates; for details, see Sadacca et al., 2016) in a separate cohort of adult male rats (n = 7) that underwent the same water restriction protocol as the rats used in the recording experiment.



## Page 8 of 38

Consumption data were averaged across two testing days for each animal. The palatability rank order determined by the brief-access test ( $S > N > W > Q$ , see **Figure 5C**) matches what has been observed in numerous studies across a broad range of stimulus delivery methods and assessment techniques (Travers and Norgren, 1986; Breslin et al., 1992; Clarke and Ossenkopp, 1998; Fontanini and Katz, 2006; Sadacca et al., 2016).

### Experimental design and statistical analysis

#### *Spatial maps:*

To characterize the spatial firing properties of neurons, two-dimensional occupancy-normalized firing rate maps (**Figure 2, 3A, 4A, 4B**) were made using 0.5 cm square bins and smoothed with a 2D Gaussian ( $\sigma = 3$  cm; Tang et al., 2017). Data from taste delivery (500 ms before to 2500 ms after) and SWR periods (see *SWR detection and modulation*) were excluded from spatial map analysis. Peak rates for each cell were defined as the maximum firing rate across all spatial bins in the spatial map.

Spatial specificity was determined by calculating the spatial information content, or amount of information that a single spike conveys about the animal's location in bits/spike using the formula:

$$\text{Spatial information content} = \sum P_i(R_i/R) \log_2(R_i/R),$$

where  $i$  is the bin number,  $P_i$  is the probability of occupancy for bin  $i$ ,  $R_i$  is the mean firing rate for bin  $i$ , and  $R$  is the overall mean firing rate of the cell (Skaggs et al., 1993).

Unpaired t-tests were used to determine whether the average spatial information content differed significantly between taste-responsive and non-taste-responsive neurons of each cell type (**Figure 3B**; pyramidal cells:  $n = 65$  taste-responsive cells,  $n = 376$  non-taste-responsive cells; interneurons:  $n = 31$  taste-responsive cells,  $n = 10$  non-taste-responsive cells).

#### *In-field vs. out-of-field analysis:*

To analyze how place cells responded to tastes delivered inside or outside of their place fields (**Figure 4**), only pyramidal cells exhibiting place-specific activity ( $n = 395$  cells, defined as neurons whose peak rate exceeded 1 Hz and spatial information content exceeded 0.2 bits/spike, similar to Moita et al., 2003) were considered. The in-field region of each cell's place field was defined as the largest cluster of neighboring bins with a firing rate exceeding 20% of the peak rate, with all other bins defined as out-of-field (Brun et al., 2002). Only place cells that contained at least ten in-field and out-of-field taste delivery trials were included in this in-field vs. out-of-field analysis ( $n = 26$  taste-responsive cells,  $n = 153$  non-taste-responsive cells). A one-way ANOVA was used to assess differences between the average in-field and out-of-field eta-squared values (see *Taste selectivity*) of taste-responsive and non-taste-responsive cells (**Figure 4C**).

#### *Taste response properties:*

The pseudo-randomized taste delivery paradigm used to characterize hippocampal responses to tastes is described above (see *Passive taste administration paradigm*). Taste responses were characterized separately for each of the 482 isolated neurons, focusing on the 2500 ms of spiking activity following each taste delivery, a time period that includes previously identified taste-related responses, but precedes swallowing behaviors that remove tastes from the tongue and make neural responses difficult to interpret (Travers and Norgren, 1986; Katz et al., 2001). We analyzed a set of response properties ranging from general to specific, as have been

identified in other parts of the taste system, including the GC (Katz et al., 2001; Sadacca et al., 2012), BLA (Fontanini et al., 2009; Piette et al., 2012), and LH (Li et al., 2013). Neurons were classified as “taste-responsive” (see **Table 1** for summary) if they exhibited responses to taste presence, identity and/or palatability, as described below. All other neurons were classified as “non-taste-responsive.” All statistical tests were performed in MATLAB and evaluated at a level of  $p = 0.05$  unless otherwise specified, with a Bonferroni correction applied for multiple comparisons.

First, non-specific responses to taste presence (**Figure 5B**, light gray lines), which are common across all four types of taste delivery and thought to originate from somatosensory responses detecting a taste on the tongue, were determined by assessing whether evoked responses differed significantly from the baseline firing rate in responses collated across all 200 taste delivery trials (Katz et al., 2001). The significance of the difference was first established using the main effect for time in a two-way, mixed-effect ANOVA (taste [saccharin, NaCl, water, quinine) x time [successive 500 ms bins of firing rate]).

Next, responses to taste identity (**Figure 5B**, dark gray lines), in which at least one taste can be discriminated from the others, were assessed by determining if the evoked responses to the four tastes (this time, collated across the 50 deliveries of each unique taste) differed from each other. We employed a similar strategy as the one used to evaluate taste responsiveness, except in this case, the main effect for taste was considered.

Finally, responses to taste palatability (**Figure 5D**), which reflected the relative hedonic value of tastes as assessed in the BAT (see **Figure 5C** and *Palatability/preference data*) were computed using a rank correlation ( $R^2$ ) between the evoked response and the palatability of the associated taste. Specifically, neurons whose evoked firing rates matched the ranking of taste

preference (S > N > W > Q) in increasing or decreasing order had higher palatability index scores.

#### *Taste selectivity:*

The magnitude of taste responsiveness for each cell was quantified using eta-squared ( $\eta^2$ ), a standard measure of ANOVA effect sizes that describes the proportion of variance in a dependent variable explained by each factor:

$$\eta^2 = SS_{(\text{factor})} / SS_{(\text{total})},$$

where SS is the sum of squares (Maier et al., 2015). In our analysis, we used the summed SS of the two main factors (time + taste) to calculate  $\eta^2$ . The Pearson correlation ( $R^2$ ) between spatial information content and eta-squared was computed separately for place cells (n = 395 cells) and interneurons (n = 41 cells). As described above (see *In-field vs. out-of-field analysis*), a one-way ANOVA was used to assess differences in  $\eta^2$  for the in-field and out-of-field regions of taste-responsive (n = 26 cells) and non-taste-responsive (n = 153 cells) place cells that fit our analysis criteria (**Figure 4C**).

#### *Taste response dynamics:*

To determine the timing of presence-, identity-, and palatability-related responses in single neurons, Student's t-tests were conducted on successive time windows of each neuron's evoked response (window size, 500 ms; step size, 50 ms; span, 0-2500 ms after taste delivery; Sadacca et al., 2012; Li et al., 2013). To analyze taste-related dynamics on a population-wide level, we constructed a histogram showing what percentage of the total 482 recorded neurons exhibited responses to taste presence, identity and palatability at each time point following

stimulus delivery (**Figure 6A**). To investigate the timing of different aspects of the taste experience present in hippocampal responses, we compared response onset times of presence- and identity-related firing (**Figure 6B**) as well as identity- and palatability-related firing (**Figure 6C**) in the subset of cells that exhibited both ( $n = 19$  and  $14$  cells, respectively). Principal component analysis (PCA, see Briggman et al., 2005; Harvey et al., 2012) was conducted on the pooled subset of 36 identity-responsive cells to determine when discriminative firing emerged in the population response following taste delivery, with significance assessed at the  $p = 0.01$  level comparing the neural data to 10,000 instances of firing-rate-shuffled controls (**Figure 6D**).

#### *Speed and position controls:*

To ensure that hippocampal responses to tastes were not actually caused by overall differences in movement following taste delivery or in response to different tastes, we used a one-way ANOVA to compare the average speed and distance traveled during the pre- vs. post-taste period (2.5 seconds before or after taste delivery, segmented into 500 ms bins with a 50 ms step size) across all tastes ( $n = 1800$  total trials across 9 sessions), as well as separately for each of the four tastes ( $n = 450$  trials of each taste across 9 sessions).

## **Results**

### **Hippocampal place cells and interneurons respond to tastes.**

We examined taste responses in a total of 482 CA1 neurons recorded across nine sessions in five rats (mean  $\pm$  SEM:  $53.6 \pm 5.34$  neurons/session) that received a battery of four standard tastes *via* IOC (**Figure 1A**). Tastes were delivered in random order and timing as rats explored the behavioral chamber, leading to a varied distribution of taste delivery locations (**Figure 1B**). Histology confirmed that the majority of our tetrodes were located intermediately along the

proximodistal axis of dorsal CA1 (**Figure 1C**; Henriksen et al., 2010). Isolated single neurons were classified as either pyramidal cells (91.5%, 441/482) or interneurons (8.5%, 41/482) on the basis of baseline firing rates and action potential shape (**Figure 1D**).

In total, 395 of the 441 pyramidal neurons were classified as place cells using standard analysis of the spatial specificity of firing rate responses (see Materials and Methods, Moita et al., 2003). The spatial firing maps of four representative place cells and interneurons (all of which were computed with taste delivery periods omitted from the analysis) are shown in the top row of **Figure 2**. As expected (O'Keefe and Dostrovsky, 1971; O'Keefe and Nadel, 1978), only the pyramidal cells had place fields (**Figure 2A, 2B**)—interneurons (**Figure 2C, 2D**) typically exhibited high spontaneous firing rates regardless of the rat's position.

A cell was considered “taste-responsive” if significant firing rate modulations were evoked by taste presence, identity, and/or palatability (see **Figure 5** for more details). In total, 96/482 (19.9%) cells were classified as taste-responsive, which is similar to the proportion reported in the only previous study to assess taste responses in individual hippocampal neurons (Ho et al., 2011). We found taste-responsive and unresponsive units on tetrodes across the proximodistal axis of dorsal CA1 (n = 50/60 tetrodes with taste-responsive units). **Table 1** shows the distribution of taste-responsive cells across animals.

The peri-stimulus time histograms (PSTHs) for an example taste-responsive place cell and interneuron are depicted in the bottom row of **Figure 2B** and **2D**. The place cell in **Figure 2B** responded to tastes from 500-1000 ms following taste delivery, while the interneuron in **Figure 2D** responded to tastes from 1200-2500 ms following taste delivery (light gray lines). In contrast, the PSTHs for non-taste-responsive cells (**Figure 2A, 2C**) show no differences in evoked activity from baseline (black dashed line) or between tastes (colored lines).

Since hippocampal activity is affected by animals' location and movement, one possible explanation of these results is that different tastes have different impacts on animals' motor behavior, and that therefore any perceived "taste"-evoked responses can simply result from changes in the animal's speed or position (O'Keefe, 1999; Shan et al., 2016). To control for this possibility, we assessed differences in rats' pre- and post-taste speed and position, both overall and between each of the four tastes. We found no differences in the average speed (before taste delivery:  $1.07 \pm 0.031$  cm/s, after taste delivery:  $1.12 \pm 0.029$  cm/s; one-way ANOVA,  $p = 0.29$ ) or distance traveled (before taste delivery:  $1.57 \pm 0.050$  cm, after taste delivery:  $1.59 \pm 0.045$  cm; one-way ANOVA,  $p = 0.74$ ) in the 2.5 seconds preceding and following taste deliveries; the same was true when trials were split up by taste identity (post-pre taste delivery speed: saccharin:  $-0.081 \pm 0.063$  cm/s, NaCl:  $0.037 \pm 0.061$  cm/s, quinine:  $0.11 \pm 0.061$  cm/s, water:  $0.12 \pm 0.070$  cm/s; one-way ANOVA,  $p = 0.10$ ; post-pre taste delivery distance: saccharin:  $-0.0026 \pm 0.11$  cm, NaCl:  $-0.029 \pm 0.11$  cm, quinine:  $0.093 \pm 0.093$  cm, water:  $0.027 \pm 0.11$  cm; one-way ANOVA,  $p = 0.86$ ). Therefore, it is unlikely that hippocampal responses to tastes were caused by changes in animals' position or locomotion; rather, they reflected sensory responses to some aspect of the taste experience itself.

### **Taste responses are gated by the spatial firing properties of hippocampal neurons.**

We found that 14.7% of place cells ( $n = 58/395$  cells) had significant responses to tastes; a far-higher percentage of interneurons (75.6%;  $n = 31/41$  cells) were taste-responsive (**Figure 2**). The significance of this larger likelihood of taste-responsiveness amongst spatially diffuse interneurons than in spatially-specific place cells (chi-square test,  $\chi^2 = 84.87$ ,  $p = 3.19 \times 10^{-20}$ ) suggests that taste responsiveness depends on the spatial firing properties of hippocampal neurons. To further investigate the relationship between place- and taste-specific firing, we compared the spatial information content (Skaggs et al., 1993) and eta-squared values (a

standard measure of ANOVA effect size, used here to quantify the magnitude of a cell's response to tastes; see Maier et al., 2015) of taste-responsive and non-taste-responsive hippocampal neurons.

**Figure 3A** depicts the firing fields of 12 example non-taste-responsive and taste-responsive place cells and interneurons, all of which were computed with taste delivery periods (extending from 500 ms before to 2500 ms after taste delivery) omitted from the analysis. As expected, place cells had a much higher average spatial information content ( $1.30 \pm 0.034$  bits/spike; higher values = smaller, more concentrated regions of enhanced firing) than interneurons ( $0.12 \pm 0.034$  bits/spike; unpaired t-test,  $p = 2.61e-25$ ). Therefore, taste responses (which were found predominately in interneurons) were associated with lower spatial information contents.

This same pattern was found to hold even within each cell type, however: cells with stronger taste-evoked responses tended to exhibit weaker spatial responses (**Figure 3B**) in analyses restricted to place cells (taste-responsive:  $0.91 \pm 0.050$  bits/spike; non-taste-responsive:  $1.37 \pm 0.038$  bits/spike; unpaired t-test,  $p = 1.03e-06$ ) and interneurons (taste-responsive:  $0.065 \pm 0.040$  bits/spike; non-taste-responsive:  $0.29 \pm 0.015$  bits/spike; unpaired t-test,  $p = 0.0027$ ), as illustrated by the larger place fields and more evenly distributed interneuron firing maps in **Figure 3A**. There was a negative correlation between spatial information content and magnitude of taste responsiveness (eta-squared, or  $\eta^2$ ) within each cell type (place cells: Pearson correlation,  $R = -0.18$ ,  $p = 3.27e-04$ ; interneurons: Pearson correlation,  $R = -0.58$ ,  $p = 5.95e-05$ ), confirming that hippocampal neurons that respond strongly to taste delivery tend to have more diffuse firing in space.



The above analysis implies that while place cells tended to exhibit fewer and lower-magnitude taste responses than interneurons, a subset of place cells exhibited taste-specific firing ( $n = 58/395$  cells; example in **Figure 2B**). Thus it is important to ask how place and taste responses interact when an animal receives familiar tastes in a specific spatial context: can place cells acquire sensory responses regardless of location, or are responses to tastes gated by spatial firing, as suggested for other sensory modalities (Moita et al., 2003; Shan et al., 2016)? To investigate this question, we compared the specificity of taste responses inside and outside each place cell's firing field.

Only place cells ( $n = 58$  taste-responsive cells,  $n = 337$  non-taste-responsive cells) were considered for in-field vs. out-of-field analysis. We defined a cell's place field as the largest area in which the firing rate exceeded 20% of the peak rate (Brun et al., 2002). To ensure sufficient sampling of taste responses, only cells that contained at least ten in-field and out-of-field trials were included in our analysis ( $n = 26$  taste-responsive cells,  $n = 153$  non-taste-responsive cells). Eta-squared was then determined separately for trials taking place within and outside each cell's place field.

**Figure 4** shows the spatial firing maps of representative taste-responsive (top) and non-taste-responsive (bottom) place cells, as well as PSTHs for trials taking place in- and out-of-field. For the taste-responsive cell (**Figure 4A**), virtually all responses occurred within the cell's place field (middle panel), with very little taste-evoked firing out of field (right panel). On the other hand, no taste-evoked responses were observed in- or out-of-field for the non-taste-responsive cell (**Figure 4B**). This trend was representative of the entire population of place cells (**Figure 4C**): the in-field region of taste-responsive cells had a higher average eta-squared value than the out-of-field region, or either region of non-taste-responsive cells (eta-squared values, taste-responsive cells, in-field:  $0.036 \pm 0.0042$ ; taste-responsive cells, out-of-field:  $0.023 \pm$

0.0027; non-taste-responsive cells, in-field:  $0.025 \pm 0.0013$ ; non-taste-responsive cells, out-of-field:  $0.0208 \pm 0.0011$ ; 1-way ANOVA,  $p = 3e-05$ ). Together, these results indicate that hippocampal taste responses are gated by the spatial firing properties of place cells—a finding that is consistent with previous studies investigating tone-evoked sensory responses during auditory fear conditioning (Moita et al., 2003; Shan et al., 2016).

**Hippocampal taste-specific responses purely reflect taste palatability, at a relatively long delay.**

Previous work has shown that taste-specific firing in GC neurons evolves through three stages: following an initial, nonspecific response to taste presence, a discriminative response conveys information about taste identity starting at approximately 200 ms after stimulus administration; after approximately 500 ms, responses then change to reflect palatability, specifically anticipating an animal's decision to consume or expel a particular taste between 600 and 1600 ms after taste delivery (Katz et al., 2001; Piette et al., 2012; Sadacca et al., 2012; Maier and Katz, 2013; Li et al., 2016; Sadacca et al., 2016). Brainstem taste responses in the parabrachial nucleus (PbN) are similarly organized (Baez-Santiago et al., 2016). Other nodes of the taste CNS, however, such as the BLA and LH, appear instead to respond primarily and immediately to the hedonic value of tastes, regardless of identity (Fontanini et al., 2009; Li et al., 2013). To determine which components are present in hippocampal taste responses (and when), we performed analyses similar to those brought to bear on firing in these other structures.

Many hippocampal neurons responded nonspecifically to taste presence, providing information that could allow for the detection of tastants on the tongue (**Figure 5A**). In a subset of these cells, responses were more discriminative, providing information about taste identity and/or palatability. Two such neurons are shown in **Figure 5B**—one of which (top) rapidly developed a response primarily to quinine, and one of which (bottom) produced a longer-latency

response that differentiated each of the four tastes, and that notably involved a sudden change of firing rate to sucrose.

Closer examination revealed that the patterning of both of these responses reflected taste palatability across the entirety of the periods of taste-specific firing (**Figure 5D**). Responses to taste palatability were assessed, as is typical in studies of taste temporal coding (Li et al., 2013; Baez-Santiago et al., 2016; Sadacca et al., 2016), in terms of the correlation between neuronal firing rates and the order of taste preference, which was assayed in a brief-access task (Li et al., 2013; Monk et al., 2014; Sadacca et al., 2016) run on a separate cohort of experimental rats (**Figure 5C**). The observed order of taste preference ( $S > N > W > Q$ ) shown in **Figure 5C** is consistent with that observed across a broad range of stimulus delivery methods and assessment techniques (Travers and Norgren, 1986; Breslin et al., 1992; Clarke and Ossenkopp, 1998; Fontanini and Katz, 2006; Sadacca et al., 2016).

**Figure 5D** reveals that palatability correlations for the example neurons shown in **Figure 5B** developed as the taste-specific responses themselves developed: the place cell's responses (**Figure 5B**, top) were significantly correlated with taste palatability between 600 and 2100 ms (**Figure 5D**, top), while the interneuron's responses (**Figure 5B**, bottom) were palatability-related between 2000 and 2500 ms (**Figure 5D**, bottom; compare these periods with the dark gray line in **Figure 5B**, which marks the period of significantly taste-specific firing).

Again, the examples shown in **Figure 5** suggest that, like responses observed in limbic structures (i.e., BLA and LH; Fontanini et al., 2009; Li et al., 2013) but unlike those in the main taste axis (i.e., GC and PbN; Sadacca et al., 2012; Baez-Santiago et al., 2016), hippocampal taste responses do not go through a period of "pure" taste specificity prior to becoming palatability-related. These appearances were borne out in an analysis of the entire neural

dataset. **Figure 6A** shows, similar to what has been observed in all other parts of the taste system (Katz et al., 2001; Sadacca et al., 2012; Baez-Santiago et al., 2016; Fontanini et al., 2009; Li et al., 2013), that totally non-specific responses to taste presence emerged first in hippocampus, followed by responses to taste identity and palatability. However, both taste specificity and palatability-relatedness appeared in hippocampal taste responses at similarly long latencies (average onset, presence:  $1032.5 \pm 55.73$  ms; identity:  $1443.1 \pm 108.07$  ms; palatability:  $1797.2 \pm 118.51$  ms).

Direct within-neuron comparisons strongly supported the group analysis. Presence-related responses reliably arose before identity-related responses in cells that responded to both properties ( $n = 19$  cells, paired t-test,  $p = 7.55e-05$ ), as also evidenced by the cloud of points above the unity line (**Figure 6B**; regression slope: 0.079,  $p = 0.79$ ). A plot of the onset latency of identity- and palatability-related responses in cells where both properties were present, meanwhile, revealed tight clustering around the unity line (**Figure 6C**;  $n = 14$  cells; regression slope: 0.92,  $p = 8.68e-06$ ) with no significant differences between onset times (paired t-test,  $p = 0.83$ ), suggesting that these properties arose simultaneously in single-unit responses.

Finally, we performed PCA by pooling responses of identity-responsive cells ( $n = 36$  cells) to examine population dynamics. This analysis revealed that tastes are discriminated based on palatability, as shown by significant encoding of palatability rank (here, in reverse order as shown in **Figure 5C**) by the principal components starting at  $\sim 1.4$  s after stimulus delivery (**Figure 6D**). PCA of the palatability-responsive cells ( $n = 18$  cells) showed the same trend, with principal components for each of the four tastes separating at  $\sim 1.4$  s following taste delivery.

We therefore conclude that hippocampal “taste codes” do not contain the purely identity-related component found in gustatory brainstem and cortex; rather, tastes are discriminated solely based on hedonic value. In this regard, hippocampal responses are similar to those observed in other non-cortical parts of the taste system, such as the BLA (Fontanini et al., 2009) and LH (Li et al., 2013); notably, however, palatability coding appears in hippocampus much later than it appears in these other limbic structures—a difference that likely has strong implications for the potential roles of the hippocampus in taste (see Discussion below).

## Discussion

Our findings suggest that place and taste responses can co-exist within the same hippocampal neurons, and that these two response modalities influence one another. Taste-responsive cells tended to have less spatially specific firing fields (**Figure 2, 3**). On the other hand, place cells that responded to tastes did so in a spatially specific manner (**Figure 4**), with responses only occurring within that cell's place field. Hippocampal neurons discriminated between tastes at relatively long latencies and purely on the basis of palatability (**Figure 5, 6**); these findings confirm additional analyses suggesting that these responses likely do not simply reflect changes in animals' movement or attentive state, as has been suggested (O'Keefe, 1999; Shan et al., 2016). Our observations add to an expanding view of the hippocampal cognitive map as a representation that encompasses both spatial and non-spatial aspects of an animal's environment (Shapiro et al., 1997; Eichenbaum et al., 1999; Wood et al., 1999; Moita et al., 2003; Kraus et al., 2013; Aronov et al., 2017).

In total, about 20% of recorded hippocampal cells in our study were classified as taste-responsive (**Figure 2**), which is similar to the proportion reported in the only previous study to assess taste responses in individual hippocampal neurons (Ho et al., 2011). This result confirms that the hippocampus contains a smaller fraction of taste-responsive neurons than that observed in brain regions traditionally considered to be part of the taste system, including the GC (Katz et al., 2001), BLA (Nishijo et al., 1998; Fontanini et al., 2009; Moran and Katz, 2014), LH (Li et al., 2013), and PbN (Baez-Santiago et al., 2016). Hippocampal taste responses were also about an order of magnitude smaller than those in GC, both in terms of eta-squared (**Figure 3C, 4C**) and palatability correlations (**Figure 5D**, Maier et al., 2015; Sadacca et al., 2016).

Unlike what has been observed in GC (Katz et al., 2001; Sadacca et al., 2016) and PbN (Baez-Santiago et al., 2016), we found little evidence of pure sensory coding in the hippocampus in this passive administration paradigm. Instead, hippocampal neurons distinguish between tastes based on palatability (**Figure 6**), similar to other limbic structures belonging to the taste system such as the BLA (Fontanini et al., 2009) and LH (Li et al., 2013). However, palatability-related hippocampal coding emerges much later than that observed in BLA or LH (Fontanini et al., 2009; Li et al., 2013), and quite likely after the time (although more direct measurements must be taken to ascertain this) that animals make decisions about palatability-related orofacial behaviors (Li et al., 2016; Sadacca et al., 2016). These results support the idea that the hippocampus does not contribute to an animal's decision to consume or expel a given taste; rather, it responds to the hedonic value of tastes consumed within a particular context. This could serve as a means of associating tastes and places, allowing animals to use past experience to locate food sources.

While spatial learning is indisputably considered to be a hippocampal-dependent process (Morris, 1984; Burgess et al., 2002; Moser et al., 2008), the role of the hippocampus in non-spatial taste learning is less clear-cut. Forms of taste learning such as conditioned taste aversion (the process by which a pleasant taste becomes aversive following its association with gastric distress) and latent inhibition (the reduction of conditioned aversion following safe pre-exposure to a taste) were once considered to be hippocampal-independent because these behaviors can persist following permanent hippocampal lesions (Gallo and Candido, 1995; Yamamoto et al., 1995; Molero-Chamizo and Moron, 2015). Other studies reveal a role for hippocampus in taste learning, for instance, during social transmission of food preferences (Bunsey and Eichenbaum, 1995; Countryman et al., 2005), but report a variety of specific behavioral effects depending on the method of perturbation used (Miller et al., 1986; Reilly et al., 1993; Stone et al., 2005; Chinnakkaruppan et al., 2014). Future studies in which individual

neurons are recorded during taste learning, which have been informative when focused on other nodes of the taste system (Grossman et al., 2008; Lavi et al., 2018), may help to decipher how the hippocampus encodes tastes and contexts to guide future food choices.

Hippocampal taste responses are almost entirely gated by the neurons' spatial firing properties (**Figure 3, 4**). Our finding that place cells only respond to tastes delivered within their place field (**Figure 4**) is consistent with previous studies (Moita et al., 2003; Shan et al., 2016), indicating that taste responses can best be understood as a rate code overlaid on existing representations of space. Since place fields can be modulated by food reward (Dupret et al., 2010; Allen et al., 2012), it seems likely that taste responses could arise as a consequence of place cell remapping. However, we could not address this question in the current study, since rats did not explore the behavioral chamber in the absence of tastes, making it difficult to calculate place fields. Future studies that incorporate place-specific taste delivery will be able to explore whether taste experience can modify animals' hippocampal representation of a particular environment through rate or global remapping, as has been shown for other sensory modalities (Moita et al., 2004; Fyhn et al., 2007; Zhang and Manahan-Vaughan, 2015).

Whatever the relationship between spatial and gustatory firing, more hippocampal interneurons—by their very nature, non-place cells—respond to non-spatial stimuli than place cells (**Figure 3**). This result is consistent with studies that measured responses to tones during fear conditioning (Moita et al., 2003) or odors in anesthetized rats (Deshmukh and Bhalla, 2003). This finding may reflect the intrinsic properties of each cell type: place cells have lower firing rates on average and rarely respond outside of their place field, while interneurons exhibit high firing rates regardless of location (see **Figure 2**), making it much easier to obtain statistical significance in the latter. Further, if spatial responses gate taste responses, non-specific spatial responses of interneurons may enable taste responses. Another (though not mutually



exclusive) possibility is that interneurons modulate place cell taste responses via long-range projections from medial entorhinal cortex (MEC, von Bohlen und Halbach and Albrecht, 2002; Melzer et al., 2012). While place cells' responses to space have been well-characterized (O'Keefe and Nadel, 1978; Moser et al., 2008), recent work suggests that interneurons also contribute to hippocampal representations of space (Wilent and Nitz, 2007), and disinhibit place cell firing through location-specific decreases in activity (Hangya et al., 2010; Royer et al., 2012). However, how non-spatial information is transmitted within hippocampal microcircuits remains an open question, one that may be investigated in future studies by determining the effect of cell-type-specific inhibition on hippocampal taste responses.

It has been suggested that lateral entorhinal cortex (LEC) plays a prominent role in routing non-spatial information to the hippocampus (Henriksen et al., 2010; Tsao et al., 2013), with LEC and MEC inputs preferentially innervating distal and proximal CA1, respectively. Our recordings were predominantly in intermediate regions of CA1 (**Figure 1C**), and we observed taste- and non-taste-responding cells across all of our tetrodes. The interactions of place and taste coding may thus reflect a combination of spatial and non-spatial input conveyed by different entorhinal sources through the hippocampal micro-circuit.

There is strong evidence that the behavioral relevance of sensory stimuli within a task influences what proportion of hippocampal neurons respond to non-spatial cues. In our study, rats passively received tastes via IOC, a paradigm that requires no learning, other than associating tastes with a context for the first time. The total proportion of taste-responsive neurons in our study (~20%, **Figure 2**) is comparable to the proportion of tone-responsive cells (16%) found by one study analyzing the auditory evoked responses of hippocampal neurons (Moita et al., 2003); however, this proportion increased to 52% following auditory fear conditioning. Similarly, ~40% of hippocampal neurons exhibited non-spatial firing during an

odor-guided non-match-to-sample task that required working memory of spatial and non-spatial factors (Wood et al., 1999). More pronounced changes in hippocampal responsiveness are observed when reward contingencies are entirely dependent on discriminating between non-spatial cues, such as in one study where rats learned to manipulate a joystick to modulate a tone within a target frequency range (Aronov et al., 2017). During this task, about 40% of hippocampal neurons responded to specific tone frequencies, compared to only 2% during the passive playback of tones. In our study, only 8% (36/482) of CA1 neurons discriminated between tastes (**Figure 5A**), with the majority of taste-responsive cells responding nonspecifically to taste presence (77/482, 16%). These results suggest that the hippocampus forms a flexible map of spatial and non-spatial stimuli based on current behavioral demands. This ongoing mental map can be stabilized by the sequential reactivation of hippocampal place cells during SWRs (van de Ven et al., 2016; Roux et al., 2017), which is thought to contribute to the Hebbian strengthening of behaviorally relevant neuronal ensembles; future work will assess whether this is true of non-spatial experiences as well.

## References

- Accolla R, Carleton A (2008) Internal body state influences topographical plasticity of sensory representations in the rat gustatory cortex. *Proc Natl Acad Sci* 105:4010-4015.
- Allen K, Rawlins JN, Bannerman DM, Csicsvari J (2012) Hippocampal place cells can encode multiple trial-dependent features through rate remapping. *J Neurosci* 32:14752-14766.
- Aronov D, Nevers R, Tank DW (2017) Mapping of a non-spatial dimension by the hippocampal-entorhinal circuit. *Nature* 543:719-722.
- Baez-Santiago MA, Reid EE, Moran A, Maier JX, Marrero-Garcia Y, Katz DB (2016) Dynamic taste responses of parabrachial pontine neurons in awake rats. *J Neurophysiol* 115:1314-1323.
- Breslin PA, Spector AC, Grill HJ (1992) A quantitative comparison of taste reactivity behaviors to sucrose before and after lithium chloride pairings: a unidimensional account of palatability. *Behav Neurosci* 106:820-836.
- Briggman KL, Abarbanel HD, Kristan WB, Jr. (2005) Optical imaging of neuronal populations during decision-making. *Science* 307:896-901.
- Brun VH, Otnass MK, Molden S, Steffenach HA, Witter MP, Moser MB, Moser EI (2002) Place cells and place recognition maintained by direct entorhinal-hippocampal circuitry. *Science* 296:2243-2246.
- Bunsey M, Eichenbaum H (1995) Selective damage to the hippocampal region blocks long-term retention of a natural and nonspatial stimulus-stimulus association. *Hippocampus* 5:546-556.
- Burgess N, Maguire EA, O'Keefe J (2002) The human hippocampus and spatial and episodic memory. *Neuron* 35:625-641.
- Chen X, Gabitto M, Peng Y, Ryba NJ, Zuker CS (2011) A gustotopic map of taste qualities in the mammalian brain. *Science* 333:1262-1266.

- Chinnakkaruppan A, Wintzer ME, McHugh TJ, Rosenblum K (2014) Differential contribution of hippocampal subfields to components of associative taste learning. *J Neurosci* 34:11007-11015.
- Clarke SN, Ossenkopp KP (1998) Taste reactivity responses in rats: influence of sex and the estrous cycle. *Am J Physiol* 274:R718-724.
- Countryman RA, Kaban NL, Colombo PJ (2005) Hippocampal c-fos is necessary for long-term memory of a socially transmitted food preference. *Neurobiol Learn Mem* 84:175-183.
- Deshmukh SS, Bhalla US (2003) Representation of odor habituation and timing in the hippocampus. *J Neurosci* 23:1903-1915.
- Dupret D, O'Neill J, Pleydell-Bouverie B, Csicsvari J (2010) The reorganization and reactivation of hippocampal maps predict spatial memory performance. *Nat Neurosci* 13:995-1002.
- Eichenbaum H, Dudchenko P, Wood E, Shapiro M, Tanila H (1999) The hippocampus, memory, and place cells: is it spatial memory or a memory space? *Neuron* 23:209-226.
- Fontanini A, Katz DB (2006) State-dependent modulation of time-varying gustatory responses. *J Neurophysiol* 96:3183-3193.
- Fontanini A, Grossman SE, Figueroa JA, Katz DB (2009) Distinct subtypes of basolateral amygdala taste neurons reflect palatability and reward. *J Neurosci* 29:2486-2495.
- Frank LM, Brown EN (2003) Persistent activity and memory in the entorhinal cortex. *Trends Neurosci* 26:400-401.
- Fried I, MacDonald KA, Wilson CL (1997) Single neuron activity in human hippocampus and amygdala during recognition of faces and objects. *Neuron* 18:753-765.
- Fyhn M, Hafting T, Treves A, Moser MB, Moser EI (2007) Hippocampal remapping and grid realignment in entorhinal cortex. *Nature* 446:190-194.
- Gallo M, Candido A (1995) Reversible inactivation of dorsal hippocampus by tetrodotoxin impairs blocking of taste aversion selectively during the acquisition but not the retrieval in rats. *Neurosci Lett* 186:1-4.

**Page 28 of 38**

678 Geran LC, Travers SP (2009) Bitter-responsive gustatory neurons in the rat parabrachial  
679 nucleus. *J Neurophysiol* 101:1598-1612.

680 Grill HJ, Norgren R (1978) The taste reactivity test. I. Mimetic responses to gustatory stimuli in  
681 neurologically normal rats. *Brain Res* 143:263-279.

682 Grossman SE, Fontanini A, Wieskopf JS, Katz DB (2008) Learning-related plasticity of temporal  
683 coding in simultaneously recorded amygdala-cortical ensembles. *J Neurosci* 28:2864-  
684 2873.

685 Haase L, Cerf-Ducastel B, Murphy C (2009) Cortical activation in response to pure taste stimuli  
686 during the physiological states of hunger and satiety. *Neuroimage* 44:1008-1021.

687 Hangya B, Li Y, Muller RU, Czurko A (2010) Complementary spatial firing in place cell-  
688 interneuron pairs. *J Physiol* 588:4165-4175.

689 Harvey CD, Coen P, Tank DW (2012) Choice-specific sequences in parietal cortex during a  
690 virtual-navigation decision task. *Nature* 484:62-68.

691 Henriksen EJ, Colgin LL, Barnes CA, Witter MP, Moser MB, Moser EI (2010) Spatial  
692 representation along the proximodistal axis of CA1. *Neuron* 68:127-137.

693 Ho AS, Hori E, Nguyen PH, Urakawa S, Kondoh T, Torii K, Ono T, Nishijo H (2011)  
694 Hippocampal neuronal responses during signaled licking of gustatory stimuli in different  
695 contexts. *Hippocampus* 21:502-519.

696 Jadhav SP, Kemere C, German PW, Frank LM (2012) Awake hippocampal sharp-wave ripples  
697 support spatial memory. *Science* 336:1454-1458.

698 Jadhav SP, Rothschild G, Roumis DK, Frank LM (2016) Coordinated Excitation and Inhibition of  
699 Prefrontal Ensembles during Awake Hippocampal Sharp-Wave Ripple Events. *Neuron*  
700 90:113-127.

701 Katz DB, Simon SA, Nicolelis MA (2001) Dynamic and multimodal responses of gustatory  
702 cortical neurons in awake rats. *J Neurosci* 21:4478-4489.

- 703 Kobayakawa T, Wakita M, Saito S, Gotow N, Sakai N, Ogawa H (2005) Location of the primary  
704 gustatory area in humans and its properties, studied by magnetoencephalography.  
705 Chem Senses 30 Suppl 1:i226-227.
- 706 Kraus BJ, Robinson RJ, 2nd, White JA, Eichenbaum H, Hasselmo ME (2013) Hippocampal  
707 "time cells": time versus path integration. Neuron 78:1090-1101.
- 708 Lavi K, Jacobson GA, Rosenblum K, Luthi A (2018) Encoding of Conditioned Taste Aversion in  
709 Cortico-Amygdala Circuits. Cell reports 24:278-283.
- 710 Leutgeb S, Leutgeb JK, Treves A, Moser MB, Moser EI (2004) Distinct ensemble codes in  
711 hippocampal areas CA3 and CA1. Science 305:1295-1298.
- 712 Leutgeb S, Leutgeb JK, Barnes CA, Moser EI, McNaughton BL, Moser M-B (2005) Independent  
713 Codes for Spatial and Episodic Memory in Hippocampal Neuronal Ensembles. Science  
714 309:619-623.
- 715 Li JX, Yoshida T, Monk KJ, Katz DB (2013) Lateral hypothalamus contains two types of  
716 palatability-related taste responses with distinct dynamics. J Neurosci 33:9462-9473.
- 717 Li JX, Maier JX, Reid EE, Katz DB (2016) Sensory Cortical Activity Is Related to the Selection of  
718 a Rhythmic Motor Action Pattern. J Neurosci 36:5596-5607.
- 719 Maier JX, Katz DB (2013) Neural dynamics in response to binary taste mixtures. J Neurophysiol  
720 109:2108-2117.
- 721 Maier JX, Blankenship ML, Li JX, Katz DB (2015) A Multisensory Network for Olfactory  
722 Processing. Curr Biol 25:2642-2650.
- 723 Melzer S, Michael M, Caputi A, Eliava M, Fuchs EC, Whittington MA, Monyer H (2012) Long-  
724 range-projecting GABAergic neurons modulate inhibition in hippocampus and entorhinal  
725 cortex. Science 335:1506-1510.
- 726 Miller JS, Nonneman AJ, Kelly KS, Neisewander JL, Isaac WL (1986) Disruption of neophobia,  
727 conditioned odor aversion, and conditioned taste aversion in rats with hippocampal  
728 lesions. Behav Neural Biol 45:240-253.

**Page 30 of 38**

- 729 Moita MA, Rosis S, Zhou Y, LeDoux JE, Blair HT (2003) Hippocampal place cells acquire  
730 location-specific responses to the conditioned stimulus during auditory fear conditioning.  
731 Neuron 37:485-497.
- 732 Moita MA, Rosis S, Zhou Y, LeDoux JE, Blair HT (2004) Putting fear in its place: remapping of  
733 hippocampal place cells during fear conditioning. J Neurosci 24:7015-7023.
- 734 Molero-Chamizo A, Moron I (2015) Latent inhibition of conditioned taste aversion in rats with  
735 excitotoxic dorsal hippocampal lesions. J Neurosci Res 93:1740-1747.
- 736 Monk KJ, Rubin BD, Keene JC, Katz DB (2014) Licking microstructure reveals rapid attenuation  
737 of neophobia. Chem Senses 39:203-213.
- 738 Moran A, Katz DB (2014) Sensory cortical population dynamics uniquely track behavior across  
739 learning and extinction. J Neurosci 34:1248-1257.
- 740 Morris R (1984) Developments of a water-maze procedure for studying spatial learning in the  
741 rat. J Neurosci Methods 11:47--60.
- 742 Moser EI, Kropff E, Moser MB (2008) Place Cells, Grid Cells, and the Brain's Spatial  
743 Representation System. Annu Rev Neurosci 31:69-89.
- 744 Nishijo H, Uwano T, Tamura R, Ono T (1998) Gustatory and multimodal neuronal responses in  
745 the amygdala during licking and discrimination of sensory stimuli in awake rats. J  
746 Neurophysiol 79:21-36.
- 747 O'Keefe J (1999) Do hippocampal pyramidal cells signal non-spatial as well as spatial  
748 information? Hippocampus 9:352-364.
- 749 O'Keefe J, Dostrovsky J (1971) The hippocampus as a spatial map. Preliminary evidence from  
750 unit activity in the freely-moving rat. Brain Res 34:171-175.
- 751 O'Keefe J, Nadel L (1978) The hippocampus as a cognitive map. London: Oxford University  
752 Press.

- Piette CE, Baez-Santiago MA, Reid EE, Katz DB, Moran A (2012) Inactivation of basolateral amygdala specifically eliminates palatability-related information in cortical sensory responses. *J Neurosci* 32:9981-9991.
- Reilly S, Harley C, Revusky S (1993) Ibotenate lesions of the hippocampus enhance latent inhibition in conditioned taste aversion and increase resistance to extinction in conditioned taste preference. *Behav Neurosci* 107:996-1004.
- Roux L, Hu B, Eichler R, Stark E, Buzsáki G (2017) Sharp wave ripples during learning stabilize the hippocampal spatial map. *Nat Neurosci* 20:1055.
- Royer S, Zemelman BV, Losonczy A, Kim J, Chance F, Magee JC, Buzsaki G (2012) Control of timing, rate and bursts of hippocampal place cells by dendritic and somatic inhibition. *Nat Neurosci* 15:769-775.
- Sadacca BF, Rothwax JT, Katz DB (2012) Sodium concentration coding gives way to evaluative coding in cortex and amygdala. *J Neurosci* 32:9999-10011.
- Sadacca BF, Mukherjee N, Vladusich T, Li JX, Katz DB, Miller P (2016) The Behavioral Relevance of Cortical Neural Ensemble Responses Emerges Suddenly. *J Neurosci* 36:655-669.
- Shan KQ, Lubenov EV, Papadopoulou M, Siapas AG (2016) Spatial tuning and brain state account for dorsal hippocampal CA1 activity in a non-spatial learning task. *eLife* 5.
- Shapiro ML, Tanila H, Eichenbaum H (1997) Cues that hippocampal place cells encode: dynamic and hierarchical representation of local and distal stimuli. *Hippocampus* 7:624-642.
- Skaggs WE, McNaughton BL, Gothard K, Markus E (1993) An information theoretic approach to deciphering the hippocampal code. In: *Advanced in Neural Information Processing Systems* (Hanson S, Cowan JD, Giles CL, eds), pp 1030-1037. San Mateo, CA: Morgan Kaufmann Publishers.



**Page 32 of 38**

778 Spetter MS, Smeets PA, de Graaf C, Viergever MA (2010) Representation of sweet and salty  
779 taste intensity in the brain. *Chem Senses* 35:831-840.

780 Stone ME, Grimes BS, Katz DB (2005) Hippocampal inactivation enhances taste learning.  
781 *Learn Mem* 12:579-586.

782 Suzuki WA, Amaral DG (1994) Perirhinal and parahippocampal cortices of the macaque  
783 monkey: cortical afferents. *J Comp Neurol* 350:497-533.

784 Tang W, Shin JD, Frank LM, Jadhav SP (2017) Hippocampal-prefrontal reactivation during  
785 learning is stronger in awake compared with sleep states. *J Neurosci* 37:11789-11805.

786 Travers JB, Norgren R (1986) Electromyographic analysis of the ingestion and rejection of sapid  
787 stimuli in the rat. *Behav Neurosci* 100:544-555.

788 Tsao A, Moser MB, Moser EI (2013) Traces of experience in the lateral entorhinal cortex. *Curr*  
789 *Biol* 23:399-405.

790 van de Ven GM, Trouche S, McNamara CG, Allen K, Dupret D (2016) Hippocampal offline  
791 reactivation consolidates recently formed cell assembly patterns during sharp wave-  
792 ripples. *Neuron* 92:968-974.

793 von Bohlen und Halbach O, Albrecht D (2002) Reciprocal connections of the hippocampal area  
794 CA1, the lateral nucleus of the amygdala and cortical areas in a combined horizontal  
795 slice preparation. *J Neurosci Res* 44:91-100.

796 Wilent WB, Nitz DA (2007) Discrete place fields of hippocampal formation interneurons. *J*  
797 *Neurophysiol* 97:4152-4161.

798 Wood ER, Dudchenko PA, Eichenbaum H (1999) The global record of memory in hippocampal  
799 neuronal activity. *Nature* 397:613-616.

800 Yamamoto T, Fujimoto Y, Shimura T, Sakai N (1995) Conditioned taste aversion in rats with  
801 excitotoxic brain lesions. *Neurosci Res* 22:31-49.

802 Zald DH, Lee JT, Fluegel KW, Pardo JV (1998) Aversive gustatory stimulation activates limbic  
803 circuits in humans. *Brain* 121 (Pt 6):1143-1154.

804 Zhang S, Manahan-Vaughan D (2015) Spatial olfactory learning contributes to place field  
805 formation in the hippocampus. *Cereb Cortex* 25:423-432.  
806

## Legends

### Figure 1. Experimental design and electrophysiology.

**A**, A portion of the timeline of an example taste delivery experiment. Colored bars indicate individual deliveries of taste stimuli: green (S, 4 mM saccharin), yellow (N, 100 mM sodium chloride), blue (W, distilled water) and red (Q, 5 mM quinine hydrochloride). Taste deliveries occurred at a randomized timing of 13-17 s, with the taste identity randomized for each trial. **B**, Example session showing all 200 taste delivery locations (colored symbols) overlaid on top of the rat's position in the behavioral chamber (gray circles) during one recording experiment. **C**, Histological verification of tetrode locations in intermediate dorsal CA1. Dotted lines indicate the extent of recording sites across all five animals. **D**, Classification of putative interneurons (Int, gray crosses) from pyramidal cells (Pyr, black circles) based on spike width ( $> 8.5$  Hz) and firing rate ( $< 0.35$  ms) parameters.

### Table 1. Cell distribution across animals.

Summary of the number of taste-responsive and total CA1 cells recorded from each animal. Only the cells meeting the inclusion criteria (see Materials and Methods) are reported. Putative pyramidal cells (Pyr) and interneurons (Int) were identified on the basis of firing rate and spike width parameters. Neurons were classified as "taste-responsive" if they exhibited responses to taste presence, identity and/or palatability.

### Figure 2. Subsets of hippocampal place cells and interneurons respond to tastes.

**A-D**, Top panels, Example spatial firing maps of two place cells (left) and interneurons (right), calculated with taste delivery periods (500 ms before to 2500 ms after taste delivery) omitted from the analysis. Numbers on the bottom right of each plot denote peak spatial firing rate (FR) in Hz. Bottom panels, Taste-evoked responses of each of the above neurons. Each colored trace represents the mean firing rate to one of the four tastes (green: S, 4 mM saccharin; yellow:

N, 100 mM sodium chloride; blue: W, distilled water; red: Q, 5 mM quinine hydrochloride), smoothed with a 1D Gaussian filter ( $\sigma = 5$  ms), with the average of all four taste-evoked responses indicated by the black dashed line. Light gray lines indicate the periods of significant taste responsiveness ( $*p < 0.05$ , t-tests on successive time windows) for the place cell in **B** and interneuron in **D**.

**Figure 3.** Taste-responsive hippocampal neurons exhibit weaker spatial selectivity than non-taste-responsive hippocampal neurons.

**A**, Example spatial firing maps of twelve non-taste-responsive (left) and taste-responsive (right) place cells (Place, top row) and interneurons (Int, bottom row). Note that taste-responsive cells tend to exhibit more diffuse spatial firing. All firing maps were computed with taste delivery periods (500 ms before to 2500 ms after taste delivery) omitted from the analysis. Numbers on the bottom right of each plot denote peak spatial firing rate (FR) in Hz. **B**, Mean spatial information content for non-taste-responsive (white bars) and taste-responsive (gray bars) place cells and interneurons. Within each cell type, taste-responsive neurons had a lower spatial information content than non-taste-responsive neurons (place cells:  $n = 337$  non-taste-responsive cells,  $n = 58$  taste-responsive cells; unpaired t-test,  $***p = 1.03e-06$ ; interneurons:  $n = 10$  non-taste-responsive cells,  $n = 31$  taste-responsive cells; unpaired t-test,  $**p = 0.0027$ ).

**Figure 4.** Place cells respond to tastes delivered within their place field.

**A-B**, Example in-field and out-of-field responses for a taste-responsive (**A**) and non-taste-responsive (**B**) place cell. Left panels show the spatial firing maps for each cell, with place field boundaries (defined as the largest region where firing exceeded 20% of the peak spatial firing rate denoted on the bottom right of each plot) indicated by black lines. The colored symbols represent locations of individual taste deliveries (green: S, 4 mM saccharin; yellow: N, 100 mM

sodium chloride; blue: W, distilled water; red: Q, 5 mM quinine hydrochloride), with in-field trials denoted in pink. All firing maps were computed with taste delivery periods (500 ms before to 2500 ms after taste delivery) omitted from the analysis. Numbers on the bottom right of each plot denote peak spatial firing rate (FR) in Hz. Right panels show the evoked responses to taste deliveries taking place in-field and out-of-field for each cell. Each colored trace represents the mean firing rate to one of the four tastes, smoothed with a 1D Gaussian filter ( $\sigma = 5$  ms). Note that taste responses are only found within the taste-responsive cell's place field (top center panel). **C**, Mean magnitude of taste responsiveness (eta-squared) for the in-field and out-of-field regions of taste-responsive and non-taste-responsive place cells that fit our criteria ( $>10$  trials in- and out-of-field;  $n = 26$  taste-responsive cells,  $n = 153$  non-taste-responsive cells). The mean eta-squared value for the in-field region of taste-responsive place cells (striped gray bar) was higher than that of the in-field region of non-taste-responsive cells (striped white bar), the out-of-field region of taste-responsive cells (gray bar), or the out-of-field region of non-taste-responsive (white bar) cells (1-way ANOVA,  $***p = 3e-05$ ), indicating that place cells only respond to tastes delivered within their place field.

**Figure 5.** Example hippocampal responses to different elements of the taste experience.

**A**, Summary of the number of taste-responsive cells ( $n = 96/482$  cells) that responded to taste presence (Pres,  $n = 77$  cells), identity (ID,  $n = 36$  cells), and/or palatability (Pal,  $n = 18$  cells). **B**, Example PSTHs from a taste-responsive place cell (top) and interneuron (bottom). Each colored trace represents the mean firing rate to one of the four tastes (green: S, 4 mM saccharin; yellow: N, 100 mM sodium chloride; blue: W, distilled water; red: Q, 5 mM quinine hydrochloride), smoothed with a 1D Gaussian filter ( $\sigma = 5$  ms), with the average of all four taste-evoked responses indicated by the black dashed line. Light gray lines indicate periods of significant responses to taste presence, while dark gray lines indicate periods of significant responses to

taste identity (\*p < 0.05, t-tests on successive time windows). **C**, Relative palatability of the four taste stimuli as determined by a brief-access task. Palatability rank is determined by the average number of licks per 15 s of exposure to the given taste. **D**, Rank correlation ( $R^2$ ) between the taste-evoked firing rates and palatability rank (S > N > W > Q) for the place cell (top) and interneuron (bottom) depicted in **B**. Black lines indicate periods of significant palatability-relatedness (\*p < 0.05, t-tests on successive time windows). Note the similarity between the timing of palatability- and identity-related responses (dark gray lines in **B**).

**Figure 6.** Hippocampal neurons discriminate between tastes based on palatability.

**A**, Histogram showing the percentage of hippocampal neurons that responded significantly to taste presence (Pres, light gray line), identity (ID, dark gray line) or palatability (Pal, black line) at each time point relative to taste delivery. Nonspecific responses to taste presence emerged before responses to taste identity or palatability, which occurred at similarly long latencies. **B**, For the 19 cells that responded significantly to taste presence and identity, the onset of the identity-related response (y-axis) is plotted against the onset of the presence-related response (x-axis). Similar to what is seen in **A**, single-neuron responses to taste presence typically preceded responses to taste identity, as evidenced by the cloud of points above the unity line (black dashed line). **C**, For the 14 cells that responded significantly to taste identity and palatability, the onset of the palatability-related response (y-axis) is plotted against the onset of the identity-related response (x-axis). Responses to identity and palatability tended to emerge simultaneously in single units, as evidenced by tight clustering around the unity line (regression slope: 0.92, \*\*\*p = 8.68e-06). **D**, PCA of identity-responsive cells (n = 36 cells). Each colored line depicts the PC of pooled responses to each of the four tastants (green: S, 4 mM saccharin; yellow: N, 100 mM sodium chloride; blue: W, distilled water; red: Q, 5 mM quinine hydrochloride) over time. Tastes were discriminated based on palatability, as shown by significant encoding of palatability rank (S > N > W > Q, in reverse order here; \*\*p < 0.01,

**Page 38 of 38**

909 comparison to firing-rate-shuffled controls) by the PCs starting at ~1.4 s after stimulus delivery  
910 (black line).

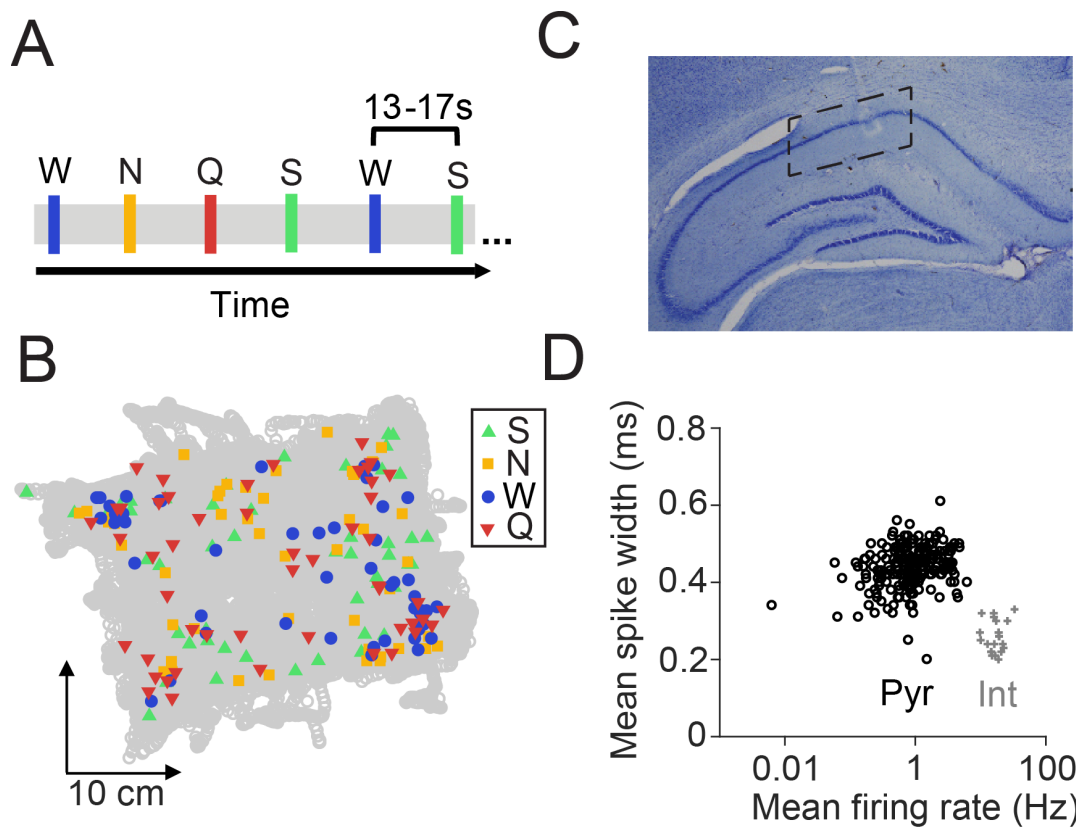

Figure 1



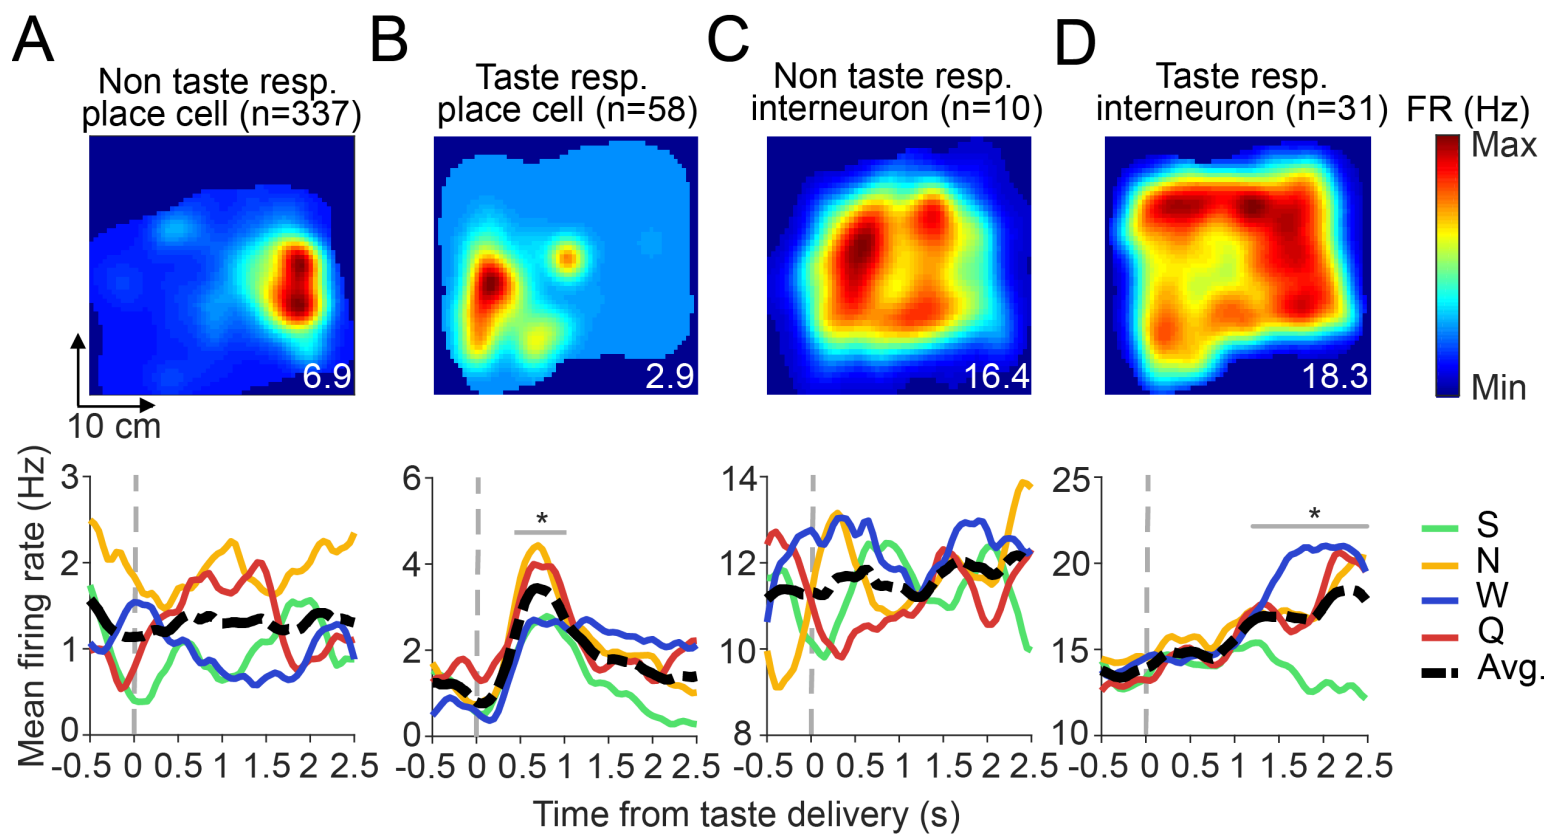

Figure 2

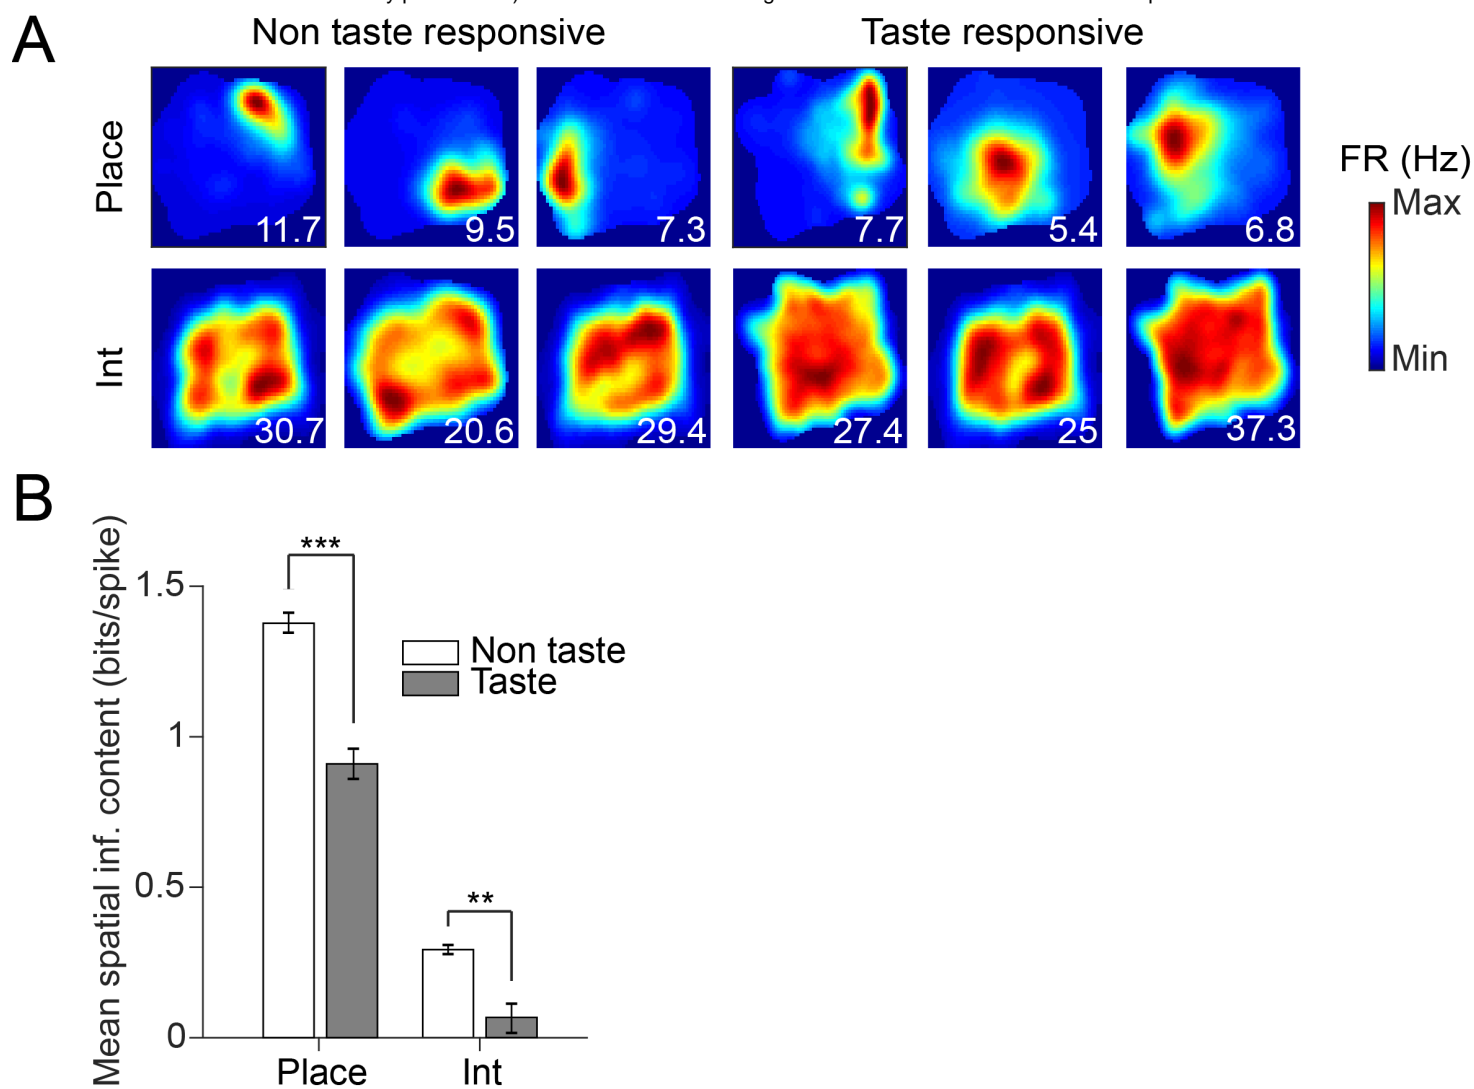

Figure 3

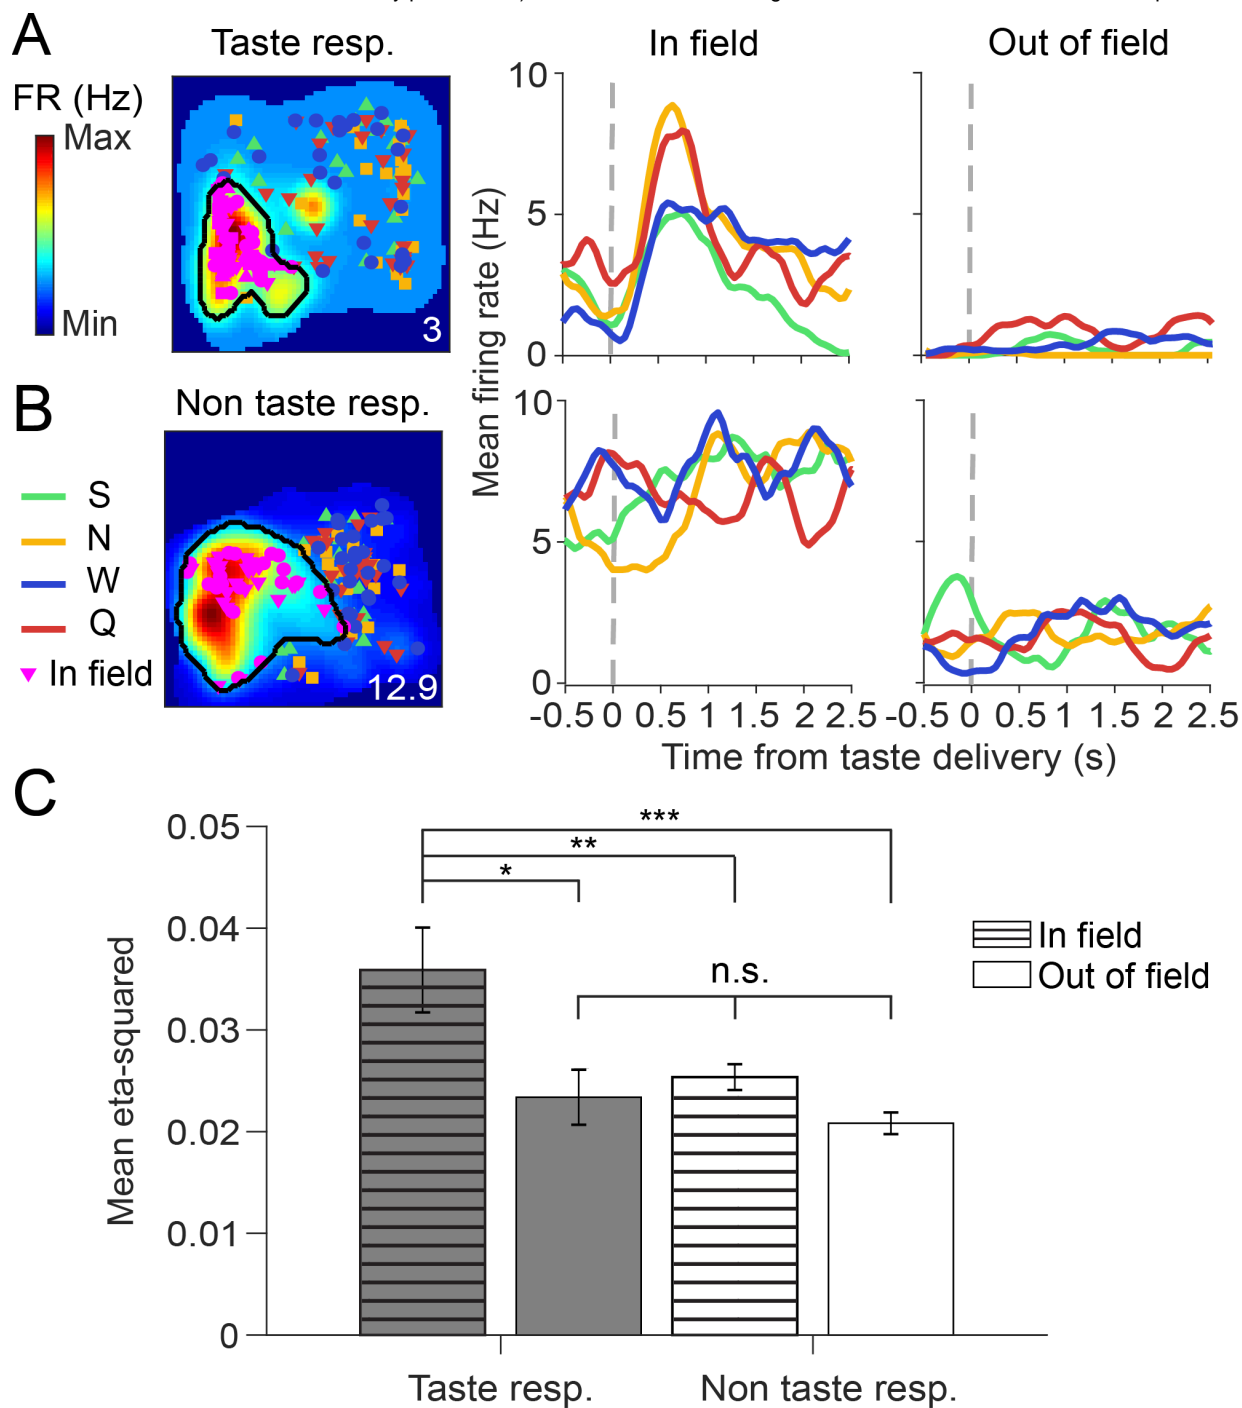

Figure 4

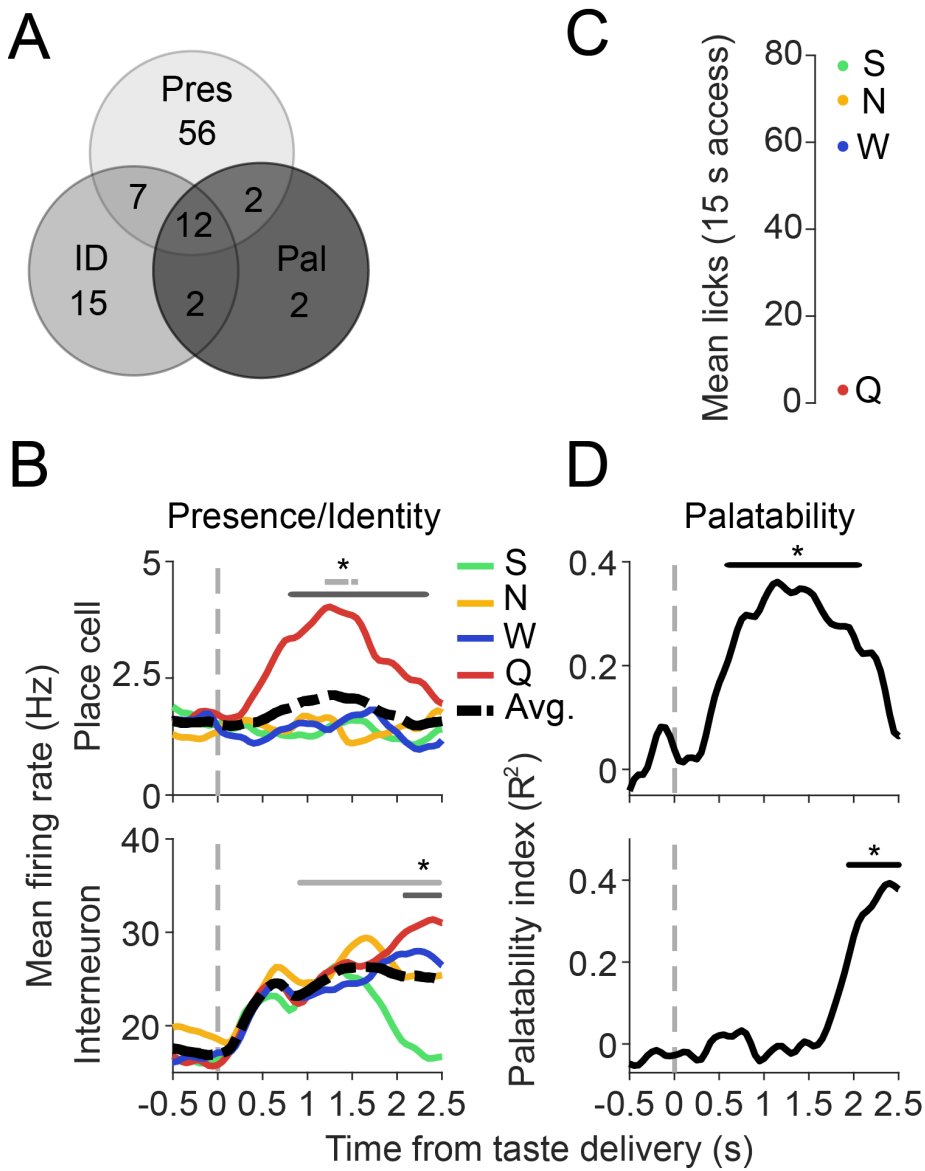

Figure 5

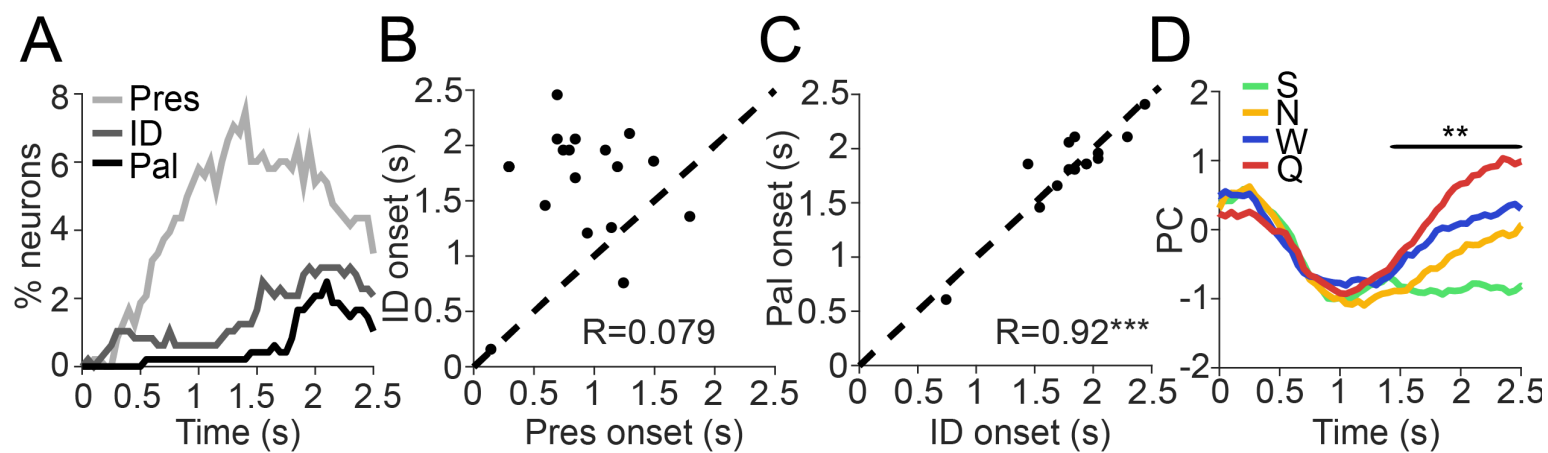

Figure 6
